# Supplementary material
Source: Springer Nature journal article supplement (https://www.springermedizin.de/resource/supplementary/12943_2010_760_MOESM3_ESM.pdf/9554756)

**A**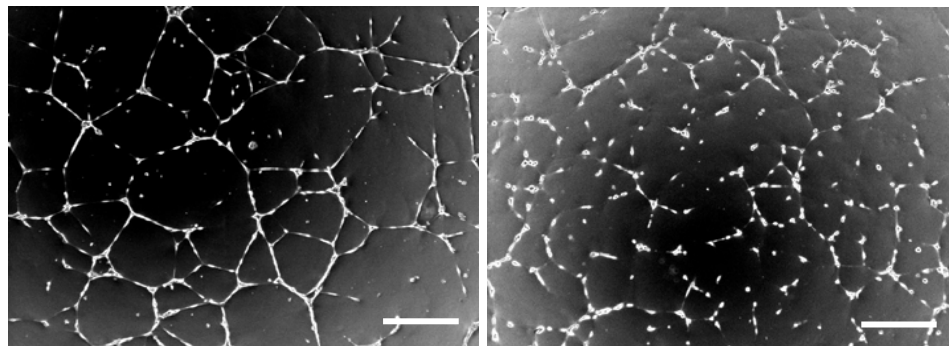**control****DIF-1****B**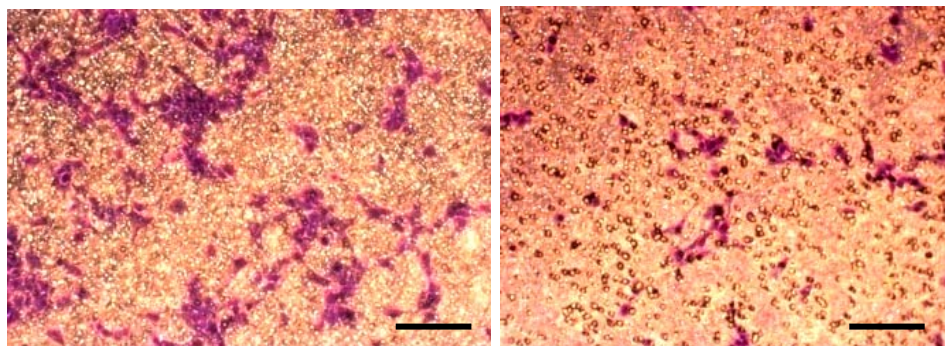**control****DIF-1**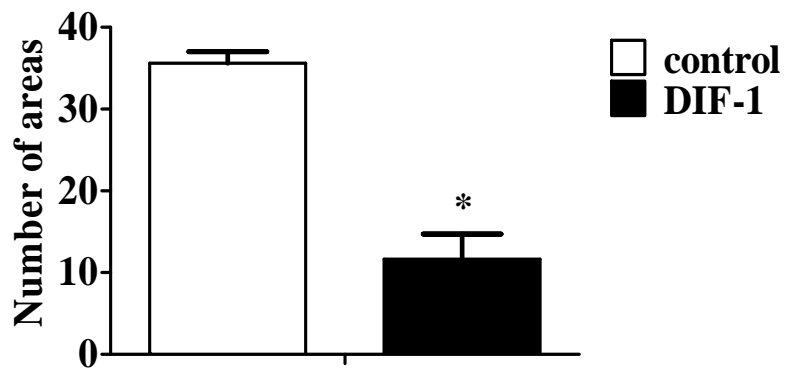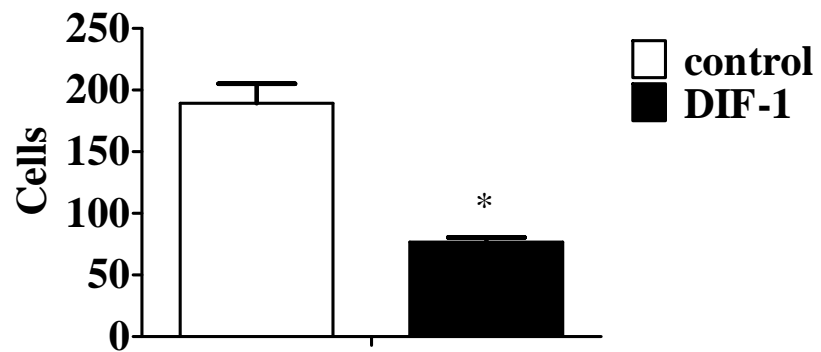

Supplement: MOESM3 [file 9554756]
